# Supplementary figures and images for: In vivo wound healing efficiency of curcumin-incorporated pectin-chitosan biodegradable films
Source: Royal Society of Chemistry journal article supplement (doi:10.1039/d1nj03477d), 2021-01-01

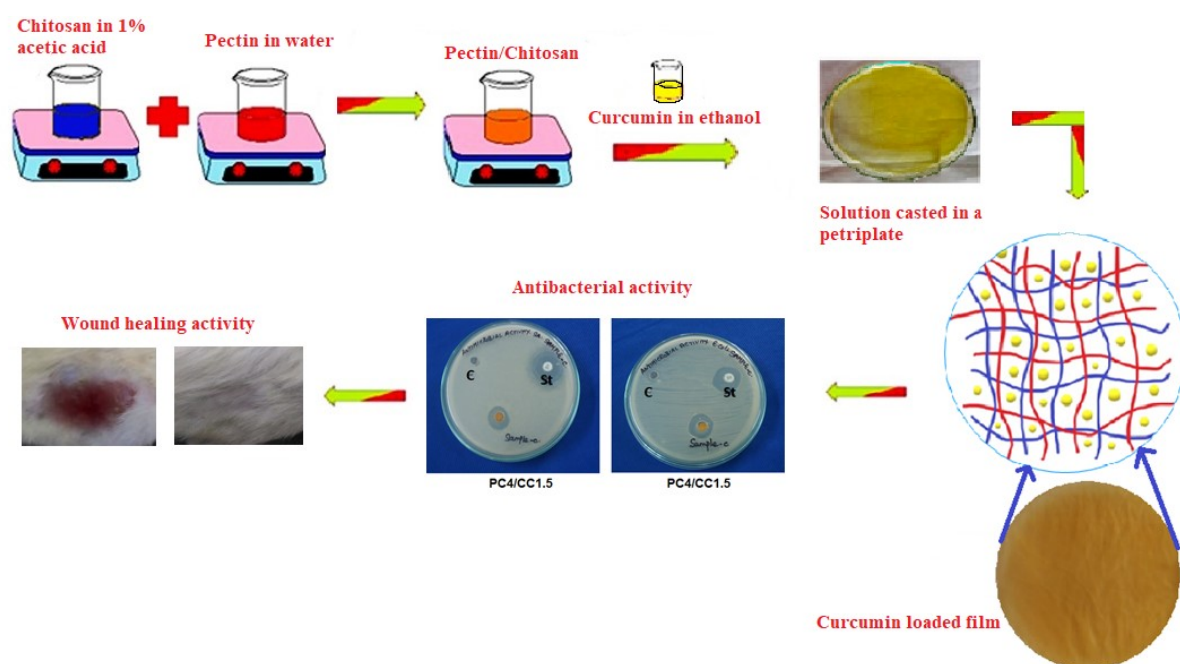

Supplement: d1nj03477d1.pdf [file d1nj03477d1.pdf]
